# Supplementary material for: Dinuclear and trinuclear cyano-bridged {DyIIIMIV} (M = W, Mo) single-ion magnets supported by pentadentate Schiff-base ligands
Source: Royal Society of Chemistry journal article supplement (doi:10.1039/d3ce00720k), 2023-01-01
Supplement: d3ce00720k1.pdf [file d3ce00720k1.pdf]

**Dinuclear and Trinuclear Cyano-Bridged {Dy<sup>III</sup>M<sup>IV</sup>} (M = W, Mo) Single-Molecule Magnets Supported by Pentadentate Schiff-Base ligands**

Pan-Dong Mao,<sup>a</sup> Hui-Ying Sun,<sup>a</sup> Fei-Fei Yan,<sup>a</sup> Shi-Hui Zhang,<sup>a</sup> Xin-Feng Li,<sup>a</sup> Ren-He Zhou,<sup>a</sup> Yi-Quan Zhang,<sup>b</sup> Yin-Shan Meng<sup>\*a</sup> and Tao Liu<sup>\*a</sup>

<sup>a</sup>. State Key Laboratory of Fine Chemicals, Frontier Science Center for Smart Materials, School of Chemical Engineering, Dalian University of Technology, Dalian 116024, China

<sup>b</sup>. Jiangsu Key Lab for NSLSCS, School of Physical Science and Technology, Nanjing Normal University, Nanjing 210023, China

\*Corresponding author. Email: mengys@dlut.edu.cn; liutao@dlut.edu.cn

## CONTENTS

|                                                                                                                                                                                                                                                                                                                                                                                                                                                    |     |
|----------------------------------------------------------------------------------------------------------------------------------------------------------------------------------------------------------------------------------------------------------------------------------------------------------------------------------------------------------------------------------------------------------------------------------------------------|-----|
| <b>Table S1.</b> Crystallographic data and structure refinements for complexes <b>1–4</b> .....                                                                                                                                                                                                                                                                                                                                                    | S1  |
| <b>Table S2.</b> Selected bond lengths (Å) and bond angles (°) for complex <b>1</b> .....                                                                                                                                                                                                                                                                                                                                                          | S2  |
| <b>Table S3.</b> Selected bond lengths (Å) and bond angles (°) for complex <b>2</b> .....                                                                                                                                                                                                                                                                                                                                                          | S4  |
| <b>Table S4.</b> Selected bond lengths (Å) and bond angles (°) for complex <b>3</b> .....                                                                                                                                                                                                                                                                                                                                                          | S6  |
| <b>Table S5.</b> Selected bond lengths (Å) and bond angles (°) for complex <b>4</b> .....                                                                                                                                                                                                                                                                                                                                                          | S8  |
| <b>Table S6.</b> Selected intra- and intermolecular distances and angles for complexes <b>1–4</b> .....                                                                                                                                                                                                                                                                                                                                            | S10 |
| <b>Table S7.</b> SHAPE analyses of Dy <sup>III</sup> in complexes <b>1–4</b> .....                                                                                                                                                                                                                                                                                                                                                                 | S11 |
| <b>Fig. S1</b> The IR spectra of complexes <b>1 (a)–4 (d)</b> at the range of 2000–2300 cm <sup>-1</sup> .....                                                                                                                                                                                                                                                                                                                                     | S12 |
| <b>Fig. S2</b> Powder-XRD diffractions of complexes <b>1 (a)–4 (d)</b> .....                                                                                                                                                                                                                                                                                                                                                                       | S13 |
| <b>Fig. S3</b> $\pi \cdots \pi$ stacking interactions between pyridyl rings and the inter/intra-molecular Dy $\cdots$ Dy distances of complex <b>1</b> are presented as red and blue dotted lines. Hydrogen atoms, uncoordinated solvent molecules, and terminal cyano groups are omitted for clarity.....                                                                                                                                         | S14 |
| <b>Fig. S4 (a)</b> Ellipsoid plot of the trinuclear structure of <b>2</b> . Displacement ellipsoids are drawn at the 30% probability level. <b>(b)</b> $\pi \cdots \pi$ stacking interactions between pyridyl rings and the inter/intra-molecular Dy $\cdots$ Dy distances of complex <b>2</b> are presented as red and blue dotted lines. Hydrogen atoms, uncoordinated solvent molecules, and terminal cyano groups are omitted for clarity..... | S15 |
| <b>Fig. S5</b> $\pi \cdots \pi$ stacking interactions between pyridyl rings and the inter/intra-molecular Dy $\cdots$ Dy distances of complex <b>3</b> are presented as red and blue dotted lines. Hydrogen atoms, uncoordinated solvent molecules, and terminal cyano groups are omitted for clarity.....                                                                                                                                         | S16 |
| <b>Fig. S6 (a)</b> Ellipsoid plot of the trinuclear structure of <b>4</b> . Displacement ellipsoids are drawn at the 30% probability level. <b>(b)</b> $\pi \cdots \pi$ stacking interactions between pyridyl rings and the inter/intra-molecular Dy $\cdots$ Dy distances of complex <b>4</b> are presented as red and blue dotted lines. Hydrogen atoms, uncoordinated solvent molecules, and terminal                                           |     |

|                                                                                                                                                                                                                                                                                                       |     |
|-------------------------------------------------------------------------------------------------------------------------------------------------------------------------------------------------------------------------------------------------------------------------------------------------------|-----|
| cyano groups are omitted for clarity except for the protonated hydrogen atoms.....                                                                                                                                                                                                                    | S17 |
| <b>Fig. S7</b> Superposition plot of complexes <b>1</b> and <b>3</b> .....                                                                                                                                                                                                                            | S18 |
| <b>Fig. S8</b> The field dependence of the reduced magnetization at the indicated temperatures for <b>1</b> (a)– <b>4</b> (d).....                                                                                                                                                                    | S19 |
| <b>Fig. S9</b> The $M$ vs. $H/T$ plots for <b>1</b> (a)– <b>4</b> (d).....                                                                                                                                                                                                                            | S20 |
| <b>Fig. S10</b> Temperature dependences of ac magnetic susceptibilities for <b>1</b> under zero dc field.....                                                                                                                                                                                         | S21 |
| <b>Fig. S11</b> Temperature dependences of ac magnetic susceptibilities for <b>2</b> under zero dc field.....                                                                                                                                                                                         | S22 |
| <b>Fig. S12</b> Temperature dependences of ac magnetic susceptibilities for <b>3</b> under zero dc field.....                                                                                                                                                                                         | S23 |
| <b>Fig. S13</b> Temperature dependences of ac magnetic susceptibilities for <b>4</b> under zero dc field.....                                                                                                                                                                                         | S24 |
| <b>Fig. S14</b> Argand plots for <b>1</b> (a), <b>2</b> (b), <b>3</b> (c), and <b>4</b> (d). The solid lines indicate the fits to the Debye functions.....                                                                                                                                            | S25 |
| <b>Computational details</b> .....                                                                                                                                                                                                                                                                    | S26 |
| <b>Fig. S15</b> Calculated structures of complexes <b>1_Dy1</b> , <b>2_Dy1</b> , <b>3</b> , and <b>4</b> . H atoms are omitted for clarify.....                                                                                                                                                       | S27 |
| <b>Table S8.</b> Calculated energy levels ( $\text{cm}^{-1}$ ), $\mathbf{g}$ ( $g_x, g_y, g_z$ ) tensors, and predominant $m_J$ values of the lowest eight Kramers doublets (KDs) of individual $\text{Dy}^{\text{III}}$ fragments of complexes <b>1–4</b> using CASSCF/RASSI-SO with OpenMolcas..... | S28 |
| <b>Table S9.</b> Wave functions with definite projection of the total moment $ m_J\rangle$ for the lowest eight KDs of individual $\text{Dy}^{\text{III}}$ fragments for complexes <b>1–4</b> using CASSCF/RASSI-SO with OpenMolcas.....                                                              | S30 |
| <b>Fig. S16</b> Magnetization blocking barriers of individual $\text{Dy}^{\text{III}}$ fragments for complexes <b>1–4</b> .....                                                                                                                                                                       | S32 |
| <b>References</b> .....                                                                                                                                                                                                                                                                               | S33 |

**Table S1.** Crystallographic data and structure refinements for complexes **1–4**.

| Complexes                                                        | 1                                                                                 | 2                                                                                  | 3                                                                     | 4                                                                      |
|------------------------------------------------------------------|-----------------------------------------------------------------------------------|------------------------------------------------------------------------------------|-----------------------------------------------------------------------|------------------------------------------------------------------------|
| Formula                                                          | C <sub>50</sub> H <sub>64</sub> N <sub>22</sub> O <sub>18</sub> Dy <sub>2</sub> W | C <sub>50</sub> H <sub>64</sub> N <sub>22</sub> O <sub>18</sub> Dy <sub>2</sub> Mo | C <sub>29</sub> H <sub>48</sub> N <sub>15</sub> O <sub>16.5</sub> DyW | C <sub>31</sub> H <sub>39</sub> N <sub>15</sub> O <sub>16.5</sub> DyMo |
| <i>T</i>                                                         | 120 K                                                                             | 120 K                                                                              | 120 K                                                                 | 120 K                                                                  |
| <i>F</i> <sub>W</sub>                                            | 1770.08                                                                           | 1682.17                                                                            | 1217.17                                                               | 1144.21                                                                |
| Crystal system                                                   | Monoclinic                                                                        | Monoclinic                                                                         | Triclinic                                                             | Triclinic                                                              |
| Space group                                                      | <i>C2/c</i>                                                                       | <i>C2/c</i>                                                                        | <i>P</i> $\bar{1}$                                                    | <i>P</i> $\bar{1}$                                                     |
| <i>a</i> (Å)                                                     | 27.0713(11)                                                                       | 26.9939(9)                                                                         | 10.4246(11)                                                           | 10.5532(9)                                                             |
| <i>b</i> (Å)                                                     | 9.5260(3)                                                                         | 9.5351(3)                                                                          | 11.7295(11)                                                           | 11.6027(10)                                                            |
| <i>c</i> (Å)                                                     | 24.0085(10)                                                                       | 24.0996(7)                                                                         | 18.7320(19)                                                           | 18.7684(16)                                                            |
| $\alpha$ (°)                                                     | 90                                                                                | 90                                                                                 | 93.031(3)                                                             | 92.524(2)                                                              |
| $\beta$ (°)                                                      | 93.820(4)                                                                         | 93.714(3)                                                                          | 95.698(3)                                                             | 95.871(2)                                                              |
| $\gamma$ (°)                                                     | 90                                                                                | 90                                                                                 | 108.135(3)                                                            | 108.109(2)                                                             |
| <i>V</i> (Å <sup>3</sup> )                                       | 6177.6(4)                                                                         | 6190.0(3)                                                                          | 2157.4(4)                                                             | 2165.8(3)                                                              |
| <i>Z</i>                                                         | 4                                                                                 | 4                                                                                  | 2                                                                     | 2                                                                      |
| $\rho_{\text{calc}}$ (mg/m <sup>3</sup> )                        | 1.903                                                                             | 1.805                                                                              | 1.874                                                                 | 1.755                                                                  |
| <i>F</i> (000)                                                   | 3472.0                                                                            | 3344.0                                                                             | 1198.0                                                                | 1140.0                                                                 |
| Reflections collected                                            | 25571                                                                             | 8872                                                                               | 75085                                                                 | 55238                                                                  |
| Unique reflections ( <i>R</i> <sub>int</sub> )                   | 0.0557                                                                            |                                                                                    | 0.0456                                                                | 0.0439                                                                 |
| Goodness-of-fit on <i>F</i> <sup>2</sup>                         | 1.059                                                                             | 0.866                                                                              | 1.081                                                                 | 1.046                                                                  |
| <i>R</i> <sub>1</sub> [ <i>I</i> > 2σ( <i>I</i> )] <sup>a</sup>  | 0.0406                                                                            | 0.0426                                                                             | 0.0378                                                                | 0.0365                                                                 |
| <i>wR</i> <sub>2</sub> [ <i>I</i> > 2σ( <i>I</i> )] <sup>b</sup> | 0.0819                                                                            | 0.1000                                                                             | 0.0847                                                                | 0.0870                                                                 |

$${}^a R_1 = \frac{\sum(|F_o| - |F_c|) / \sum |F_o|}{}$$

$${}^b wR_2 = \frac{\{\sum[w(F_o^2 - F_c^2)^2] / \sum[w(F_o^2)^2]\}^{1/2}}{}$$

---

**Table S2.** Selected bond lengths (Å) and bond angles (°) for complex **1**.

---

**Complex 1**<sup>120 K</sup>

---

Bond length (Å)

---

|        |          |        |          |
|--------|----------|--------|----------|
| Dy1–N4 | 2.482(5) | Dy1–O2 | 2.404(3) |
| Dy1–N7 | 2.596(4) | Dy1–O3 | 2.345(3) |
| Dy1–N8 | 2.575(4) | Dy1–O4 | 2.405(3) |
| Dy1–N9 | 2.529(4) | Dy1–O5 | 2.339(3) |
| Dy1–O1 | 2.475(3) |        |          |

## Bond angle (°)

|           |            |           |            |
|-----------|------------|-----------|------------|
| N4–Dy1–N7 | 64.46(14)  | O3–Dy1–N8 | 124.62(12) |
| N4–Dy1–N8 | 86.41(15)  | O3–Dy1–N9 | 63.71(12)  |
| N4–Dy1–N9 | 129.71(15) | O3–Dy1–O1 | 101.96(11) |
| N8–Dy1–N7 | 60.26(12)  | O3–Dy1–O2 | 70.17(11)  |
| N9–Dy1–N7 | 118.05(12) | O3–Dy1–O4 | 81.05(12)  |
| N9–Dy1–N8 | 61.51(13)  | O3–Dy1–O5 | 77.74(12)  |
| O1–Dy1–N4 | 80.69(14)  | O4–Dy1–N4 | 73.20(14)  |
| O1–Dy1–N7 | 61.64(18)  | O4–Dy1–N7 | 125.28(13) |
| O1–Dy1–N8 | 120.33(11) | O4–Dy1–N8 | 84.92(12)  |
| O1–Dy1–N9 | 148.12(12) | O4–Dy1–N9 | 66.73(12)  |
| O2–Dy1–N4 | 71.26(14)  | O4–Dy1–O1 | 142.43(11) |
| O2–Dy1–N7 | 117.81(11) | O5–Dy1–N4 | 139.53(14) |
| O2–Dy1–N8 | 153.92(13) | O5–Dy1–N7 | 76.66(12)  |
| O2–Dy1–N9 | 123.66(12) | O5–Dy1–N8 | 83.76(13)  |
| O2–Dy1–O1 | 70.22(11)  | O5–Dy1–N9 | 77.95(12)  |
| O2–Dy1–O4 | 76.00(12)  | O5–Dy1–O1 | 70.99(11)  |

---

|           |            |           |            |
|-----------|------------|-----------|------------|
| O3-Dy1-N4 | 137.62(13) | O5-Dy1-O2 | 121.98(13) |
| O3-Dy1-N7 | 153.09(13) | O5-Dy1-O4 | 144.11(11) |

---

---

**Table S3.** Selected bond lengths (Å) and bond angles (°) for complex **2**.

---

**Complex 2**<sup>120 K</sup>

---

## Bond length (Å)

|        |          |        |          |
|--------|----------|--------|----------|
| Dy1–N4 | 2.491(8) | Dy1–O2 | 2.417(5) |
| Dy1–N7 | 2.599(7) | Dy1–O3 | 2.351(5) |
| Dy1–N8 | 2.572(6) | Dy1–O4 | 2.402(5) |
| Dy1–N9 | 2.525(6) | Dy1–O5 | 2.337(5) |
| Dy1–O1 | 2.474(5) |        |          |

## Bond angle (°)

|           |            |           |            |
|-----------|------------|-----------|------------|
| N4–Dy1–N7 | 64.6(2)    | O3–Dy1–N8 | 124.60(19) |
| N4–Dy1–N8 | 87.0(2)    | O3–Dy1–N9 | 63.6(2)    |
| N4–Dy1–N9 | 130.6(2)   | O3–Dy1–O1 | 101.92(18) |
| N8–Dy1–N7 | 64.6(2)    | O3–Dy1–O2 | 70.54(18)  |
| N9–Dy1–N7 | 118.1(2)   | O3–Dy1–O4 | 81.38(19)  |
| N9–Dy1–N8 | 61.5(2)    | O3–Dy1–O5 | 77.83(19)  |
| O1–Dy1–N4 | 80.0(2)    | O4–Dy1–N4 | 73.3(2)    |
| O1–Dy1–N7 | 61.70(19)  | O4–Dy1–N7 | 124.9(2)   |
| O1–Dy1–N8 | 120.71(18) | O4–Dy1–N8 | 84.3(2)    |
| O1–Dy1–N9 | 148.0(2)   | O4–Dy1–N9 | 66.9(2)    |
| O2–Dy1–N4 | 70.0(2)    | O4–Dy1–O1 | 142.39(18) |
| O2–Dy1–N7 | 117.73(19) | O5–Dy1–N4 | 139.4(2)   |
| O2–Dy1–N8 | 152.9(2)   | O5–Dy1–N7 | 76.6(2)    |
| O2–Dy1–N9 | 123.65(19) | O5–Dy1–N8 | 84.0(2)    |
| O2–Dy1–O1 | 70.55(17)  | O5–Dy1–N9 | 77.7(2)    |
| O2–Dy1–O4 | 75.63(19)  | O5–Dy1–O1 | 71.15(18)  |

---

|           |          |           |            |
|-----------|----------|-----------|------------|
| O3-Dy1-N4 | 137.2(2) | O5-Dy1-O2 | 122.8(2)   |
| O3-Dy1-N7 | 153.1(2) | O5-Dy1-O4 | 144.18(18) |

---



---

**Table S4.** Selected bond lengths (Å) and bond angles (°) for complex **3**.

---

**Complex 3**<sup>120 K</sup>

---

Bond length (Å)

---

|         |          |        |          |
|---------|----------|--------|----------|
| Dy1–N8  | 2.462(4) | Dy1–O2 | 2.454(4) |
| Dy1–N11 | 2.619(5) | Dy1–O3 | 2.353(4) |
| Dy1–N12 | 2.602(4) | Dy1–O4 | 2.394(4) |
| Dy1–N13 | 2.553(4) | Dy1–O5 | 2.313(4) |
| Dy1–O1  | 2.411(4) |        |          |

## Bond angle (°)

|             |            |            |            |
|-------------|------------|------------|------------|
| N8–Dy1–N11  | 66.03(15)  | O3–Dy1–N13 | 63.13(13)  |
| N8–Dy1–N12  | 87.71(15)  | O3–Dy1–O1  | 105.62(12) |
| N8–Dy1–N13  | 131.93(14) | O3–Dy1–O2  | 65.68(12)  |
| N12–Dy1–N11 | 59.68(14)  | O3–Dy1–O4  | 79.73(13)  |
| N13–Dy1–N11 | 116.11(14) | O4–Dy1–N8  | 71.81(14)  |
| N13–Dy1–N12 | 61.12(14)  | O4–Dy1–N11 | 125.05(13) |
| O1–Dy1–N8   | 75.90(14)  | O4–Dy1–N12 | 85.69(13)  |
| O1–Dy1–N11  | 61.69(13)  | O4–Dy1–N13 | 70.32(13)  |
| O1–Dy1–N12  | 120.82(13) | O4–Dy1–O1  | 137.00(13) |
| O1–Dy1–N13  | 150.67(13) | O4–Dy1–O2  | 79.76(13)  |
| O1–Dy1–O2   | 65.20(13)  | O5–Dy1–N8  | 139.05(14) |
| O2–Dy1–N8   | 75.82(14)  | O5–Dy1–N11 | 76.60(14)  |
| O2–Dy1–N11  | 119.90(14) | O5–Dy1–N12 | 87.55(14)  |
| O2–Dy1–N12  | 160.73(13) | O5–Dy1–N13 | 79.09(13)  |
| O2–Dy1–N13  | 123.95(13) | O5–Dy1–O1  | 71.94(12)  |
| O3–Dy1–N8   | 135.39(14) | O5–Dy1–O2  | 111.44(13) |

---

|            |            |           |            |
|------------|------------|-----------|------------|
| O3-Dy1-N11 | 154.55(13) | O5-Dy1-O3 | 78.43(14)  |
| O3-Dy1-N12 | 124.10(14) | O5-Dy1-O4 | 148.06(13) |

---

---

**Table S5.** Selected bond lengths (Å) and bond angles (°) for complex **4**.

---

**Complex 4<sup>120 K</sup>**

---

## Bond length (Å)

|         |          |        |          |
|---------|----------|--------|----------|
| Dy1–N8  | 2.463(3) | Dy1–O2 | 2.447(3) |
| Dy1–N11 | 2.614(3) | Dy1–O3 | 2.359(3) |
| Dy1–N12 | 2.591(3) | Dy1–O4 | 2.395(3) |
| Dy1–N13 | 2.549(3) | Dy1–O5 | 2.322(3) |
| Dy1–O1  | 2.411(3) |        |          |

## Bond angle (°)

|             |            |            |            |
|-------------|------------|------------|------------|
| N8–Dy1–N11  | 66.39(11)  | O3–Dy1–N13 | 63.08(10)  |
| N8–Dy1–N12  | 86.92(11)  | O3–Dy1–O1  | 105.57(9)  |
| N8–Dy1–N13  | 131.42(11) | O3–Dy1–O2  | 66.00(10)  |
| N12–Dy1–N11 | 59.70(10)  | O3–Dy1–O4  | 80.11(10)  |
| N13–Dy1–N11 | 115.75(11) | O4–Dy1–N8  | 71.62(11)  |
| N13–Dy1–N12 | 61.10(10)  | O4–Dy1–N11 | 125.00(10) |
| O1–Dy1–N8   | 76.24(11)  | O4–Dy1–N12 | 84.72(10)  |
| O1–Dy1–N11  | 61.92(10)  | O4–Dy1–N13 | 70.00(10)  |
| O1–Dy1–N12  | 121.20(10) | O4–Dy1–O1  | 137.23(10) |
| O1–Dy1–N13  | 150.82(10) | O4–Dy1–O2  | 79.55(10)  |
| O1–Dy1–O2   | 65.59(10)  | O5–Dy1–N8  | 139.28(11) |
| O2–Dy1–N8   | 75.79(11)  | O5–Dy1–N11 | 76.24(10)  |
| O2–Dy1–N11  | 120.42(10) | O5–Dy1–N12 | 87.91(10)  |
| O2–Dy1–N12  | 159.54(11) | O5–Dy1–N13 | 78.97(10)  |
| O2–Dy1–N13  | 123.80(10) | O5–Dy1–O1  | 72.22(10)  |
| O3–Dy1–N8   | 135.79(11) | O5–Dy1–O2  | 112.32(10) |

---

|            |            |           |            |
|------------|------------|-----------|------------|
| O3-Dy1-N11 | 154.06(11) | O5-Dy1-O3 | 78.25(10)  |
| O3-Dy1-N12 | 124.06(10) | O5-Dy1-O4 | 147.77(10) |

---

**Table S6.** Selected intra- and intermolecular distances and angles for complexes **1–4**.

| angles (°)                                                       | <b>1</b> | <b>2</b> | <b>3</b> | <b>4</b> |
|------------------------------------------------------------------|----------|----------|----------|----------|
| Dy1–M1–Dy1a                                                      | 145.18   | 144.71   |          |          |
| Dy1–N4–C4                                                        | 160.72   | 160.97   |          |          |
| Dy1–N8–C8                                                        |          |          | 148.98   | 149.07   |
| <b>The intramolecular distances between the centre atoms (Å)</b> |          |          |          |          |
| Dy1···Dy1a                                                       | 10.834   | 10.838   |          |          |
| Dy1–M1                                                           | 5.673    | 5.672    | 5.541    | 5.539    |
| <b>The shortest intermolecular Dy···Dy distances (Å)</b>         |          |          |          |          |
| Dy···Dy                                                          | 7.272    | 7.251    | 7.257    | 7.267    |
| <b>Intermolecular <math>\pi\cdots\pi</math> (Å) contacts</b>     |          |          |          |          |
| $\pi_{\text{pyridyl}}\cdots\pi_{\text{pyridyl}}$ (red)           | 3.927    | 3.890    | 3.689    | 3.702    |

M = W, Mo

**Table S7.** SHAPE analyses of Dy<sup>III</sup> in complexes **1–4**.

EP ( $D_{9h}$ ): Enneagon; OPY ( $C_{8v}$ ): Octagonal pyramid; HBPY ( $D_{7h}$ ): Heptagonal bipyramid; JTC ( $C_{3v}$ ): Johnson triangular cupola J3; JCCU ( $C_{4v}$ ): Capped cube J8; CCU ( $C_{4v}$ ): Spherical-relaxed capped cube; JCSAPR ( $C_{4v}$ ): Capped square antiprism J10; CSAPR ( $C_{4v}$ ): Spherical capped square antiprism; JTCTPR ( $D_{3h}$ ): Tricapped trigonal prism J51; TCTPR ( $D_{3h}$ ): Spherical tricapped trigonal prism; JTDIC ( $C_{3v}$ ): Tridiminished icosahedron J63; HH ( $C_{2v}$ ): Hula-hoop; MFF ( $C_s$ ): Muffin.

|             | EP<br>( $D_{9h}$ )    | OPY<br>( $C_{8v}$ )    | HBPY<br>( $D_{7h}$ )  | JTC<br>( $C_{3v}$ )   | JCCU<br>( $C_{4v}$ ) | CCU<br>( $C_{4v}$ ) | JCSAPR<br>( $C_{4v}$ ) |
|-------------|-----------------------|------------------------|-----------------------|-----------------------|----------------------|---------------------|------------------------|
| <b>1_Dy</b> | 31.066                | 23.086                 | 15.742                | 14.976                | 6.765                | 5.659               | 4.030                  |
|             | CSAPR<br>( $C_{4v}$ ) | JTCTPR<br>( $D_{3h}$ ) | TCTPR<br>( $D_{3h}$ ) | JTDIC<br>( $C_{3v}$ ) | HH<br>( $C_{2v}$ )   | MFF<br>( $C_s$ )    |                        |
|             | 3.056                 | 3.198                  | 3.026                 | 13.093                | 6.512                | 2.798               |                        |
|             | EP<br>( $D_{9h}$ )    | OPY<br>( $C_{8v}$ )    | HBPY<br>( $D_{7h}$ )  | JTC<br>( $C_{3v}$ )   | JCCU<br>( $C_{4v}$ ) | CCU<br>( $C_{4v}$ ) | JCSAPR<br>( $C_{4v}$ ) |
| <b>2_Dy</b> | 31.198                | 23.040                 | 15.761                | 15.126                | 6.818                | 5.685               | 3.972                  |
|             | CSAPR<br>( $C_{4v}$ ) | JTCTPR<br>( $D_{3h}$ ) | TCTPR<br>( $D_{3h}$ ) | JTDIC<br>( $C_{3v}$ ) | HH<br>( $C_{2v}$ )   | MFF<br>( $C_s$ )    |                        |
|             | 2.990                 | 3.194                  | 2.985                 | 12.979                | 6.550                | 2.679               |                        |
|             | EP<br>( $D_{9h}$ )    | OPY<br>( $C_{8v}$ )    | HBPY<br>( $D_{7h}$ )  | JTC<br>( $C_{3v}$ )   | JCCU<br>( $C_{4v}$ ) | CCU<br>( $C_{4v}$ ) | JCSAPR<br>( $C_{4v}$ ) |
| <b>3_Dy</b> | 31.248                | 21.765                 | 15.131                | 15.653                | 6.944                | 5.799               | 4.705                  |
|             | CSAPR<br>( $C_{4v}$ ) | JTCTPR<br>( $D_{3h}$ ) | TCTPR<br>( $D_{3h}$ ) | JTDIC<br>( $C_{3v}$ ) | HH<br>( $C_{2v}$ )   | MFF<br>( $C_s$ )    |                        |
|             | 3.706                 | 3.970                  | 4.177                 | 12.359                | 4.877                | 2.983               |                        |
|             | EP<br>( $D_{9h}$ )    | OPY<br>( $C_{8v}$ )    | HBPY<br>( $D_{7h}$ )  | JTC<br>( $C_{3v}$ )   | JCCU<br>( $C_{4v}$ ) | CCU<br>( $C_{4v}$ ) | JCSAPR<br>( $C_{4v}$ ) |
| <b>4_Dy</b> | 31.454                | 21.865                 | 15.234                | 15.621                | 7.057                | 5.905               | 4.536                  |
|             | CSAPR<br>( $C_{4v}$ ) | JTCTPR<br>( $D_{3h}$ ) | TCTPR<br>( $D_{3h}$ ) | JTDIC<br>( $C_{3v}$ ) | HH<br>( $C_{2v}$ )   | MFF<br>( $C_s$ )    |                        |
|             | 3.520                 | 3.883                  | 3.997                 | 12.451                | 4.981                | 2.859               |                        |

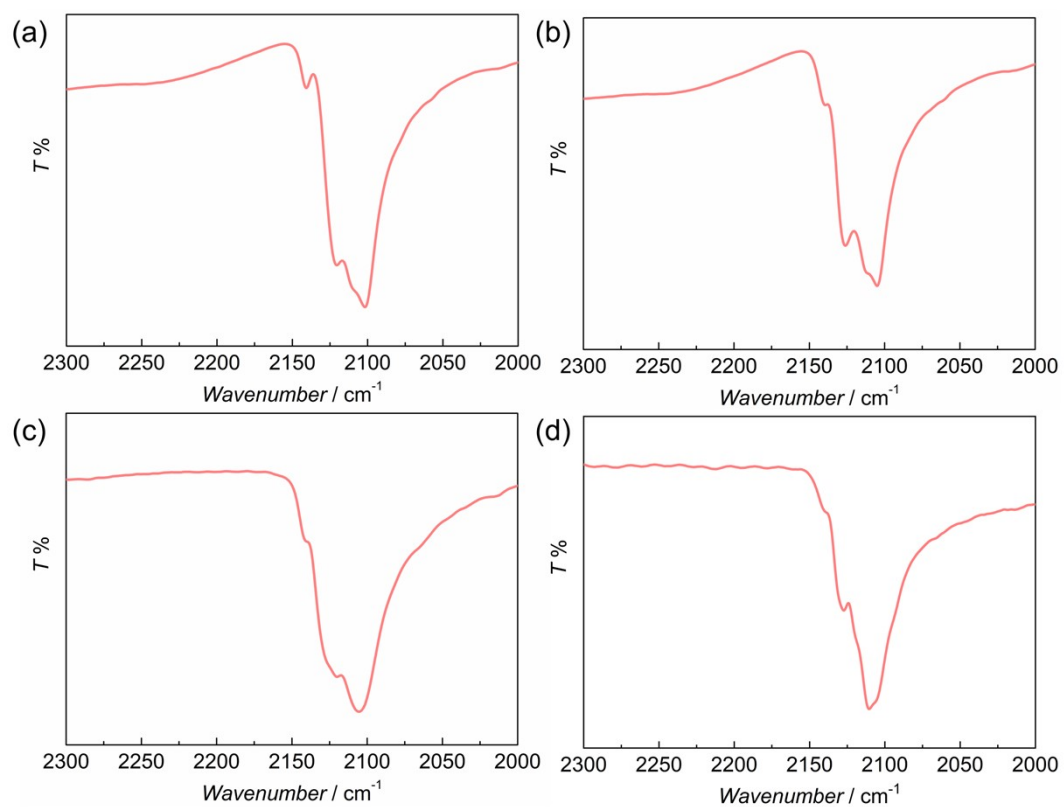

**Fig. S1** The IR spectra of complexes **1** (a)–**4** (d) at the range of 2000–2300 cm<sup>-1</sup>.

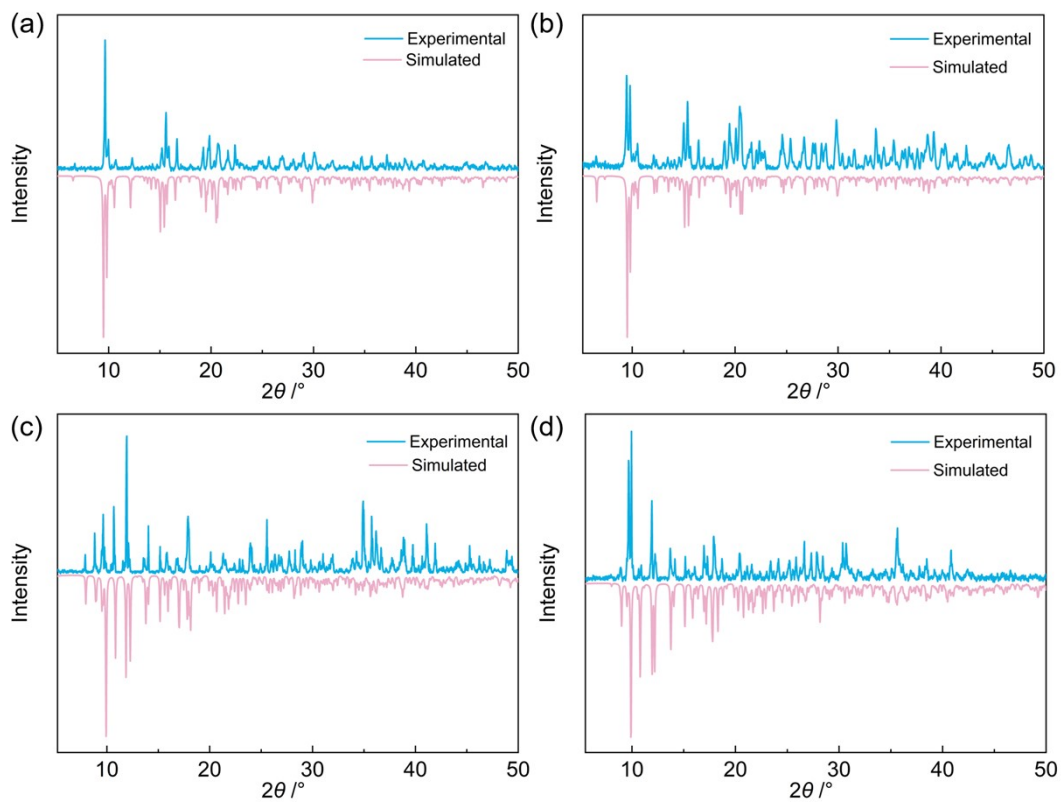

**Fig. S2** Powder-XRD diffractions of complexes **1** (a)–4 (d).



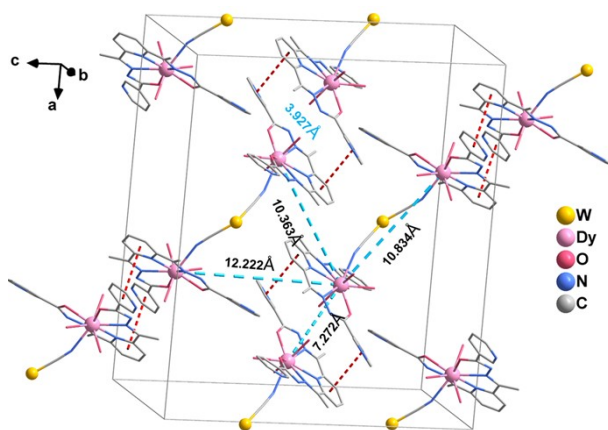

**Fig. S3**  $\pi \cdots \pi$  stacking interactions between pyridyl rings and the inter/intra-molecular Dy···Dy distances of complex **1** are presented as red and blue dotted lines. Hydrogen atoms, uncoordinated solvent molecules, and terminal cyano groups are omitted for clarity.

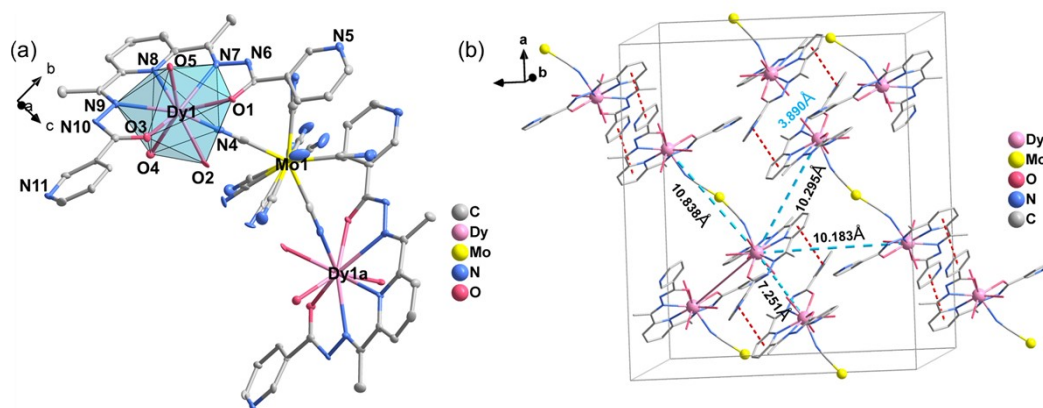

**Fig. S4** (a) Ellipsoid plot of the trinuclear structure of **2**. Displacement ellipsoids are drawn at the 30% probability level. (b)  $\pi \cdots \pi$  stacking interactions between pyridyl rings and the inter/intra-molecular Dy $\cdots$ Dy distances of complex **2** are presented as red and blue dotted lines. Hydrogen atoms, uncoordinated solvent molecules, and terminal cyano groups are omitted for clarity.

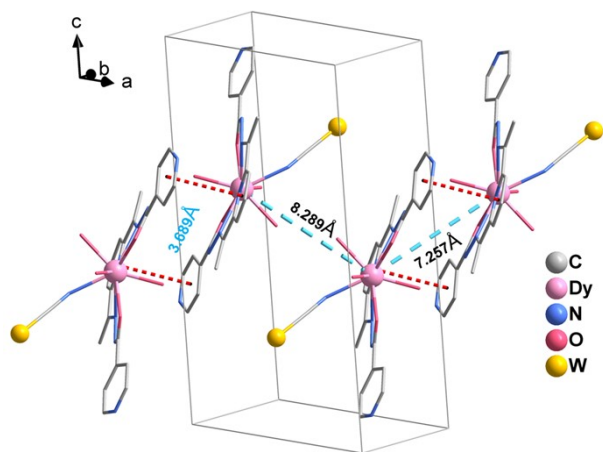

**Fig. S5**  $\pi \cdots \pi$  stacking interactions between pyridyl rings and the inter/intra-molecular Dy $\cdots$ Dy distances of complex **3** are presented as red and blue dotted lines. Hydrogen atoms, uncoordinated solvent molecules, and terminal cyano groups are omitted for clarity.

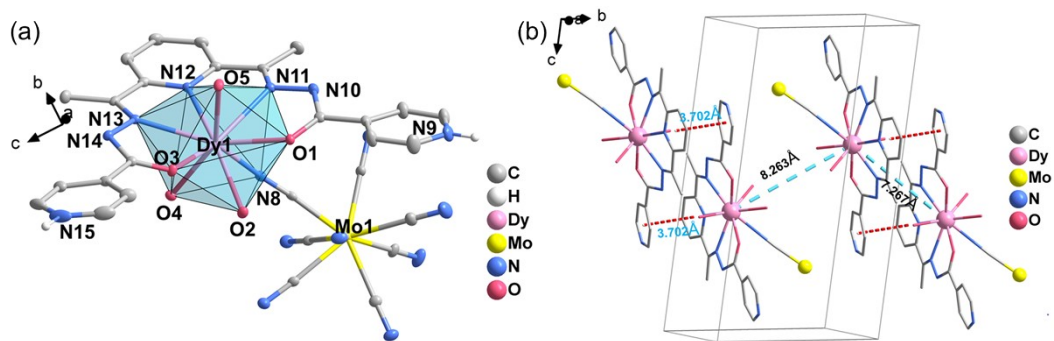

**Fig. S6** (a) Ellipsoid plot of the trinuclear structure of **4**. Displacement ellipsoids are drawn at the 30% probability level. (b)  $\pi \cdots \pi$  stacking interactions between pyridyl rings and the inter/intra-molecular Dy $\cdots$ Dy distances of complex **4** are presented as red and blue dotted lines. Hydrogen atoms, uncoordinated solvent molecules, and terminal cyano groups are omitted for clarity except for the protonated hydrogen atoms.

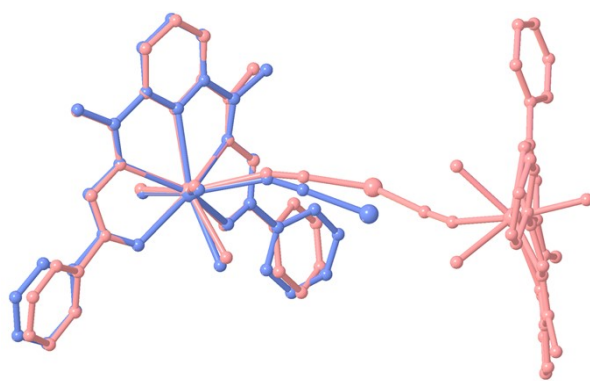

**Fig. S7** Superposition plot of complexes **1** and **3**.

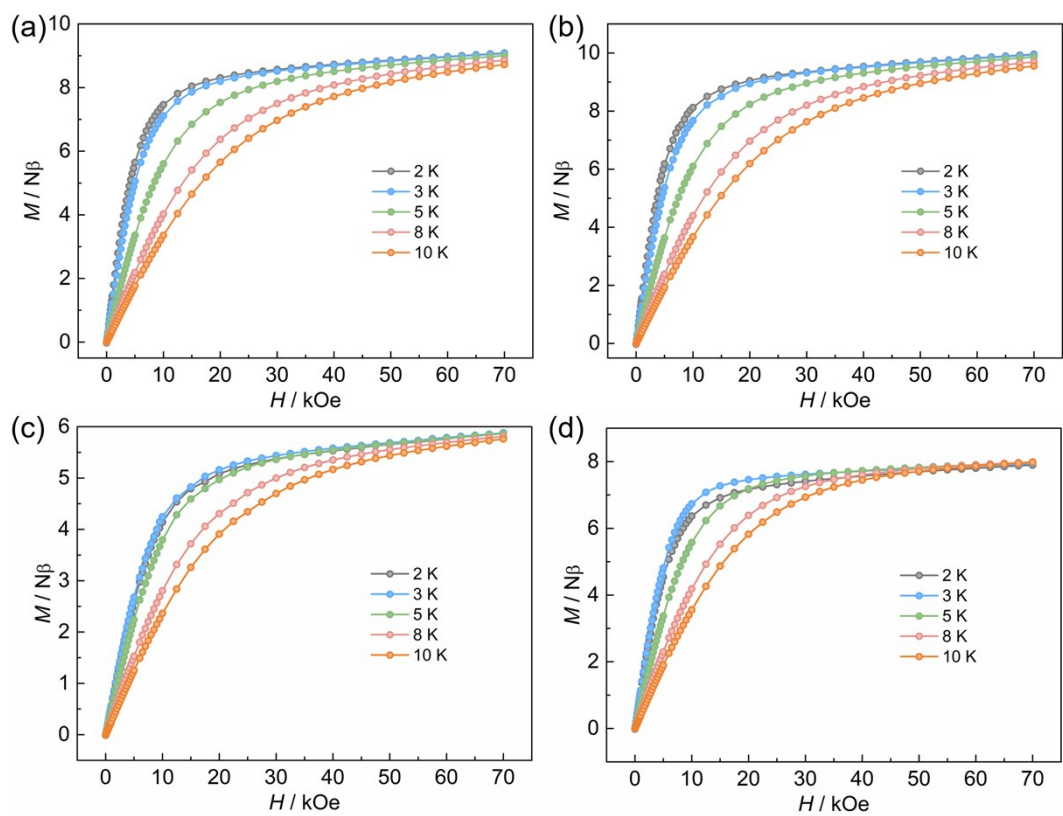

**Fig. S8** The field dependence of the reduced magnetization at the indicated temperatures for **1** (a)–4 (d).

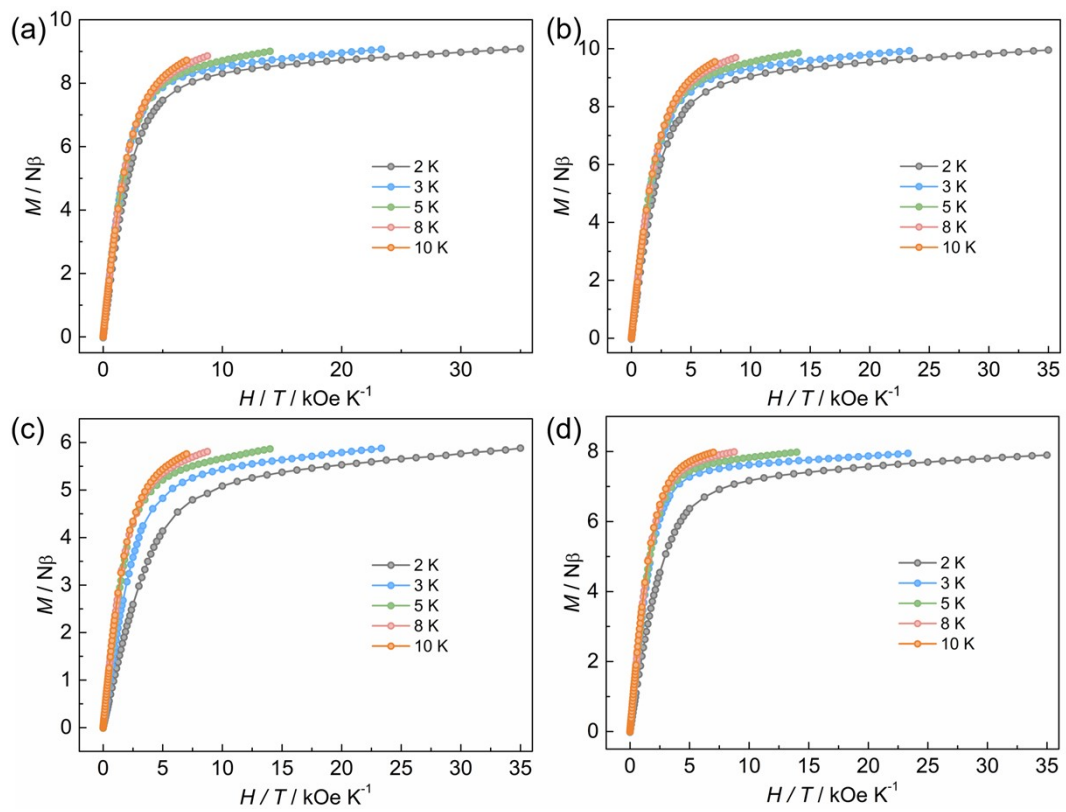

**Fig. S9** The  $M$  vs.  $H/T$  plots for **1** (a)–4 (d).

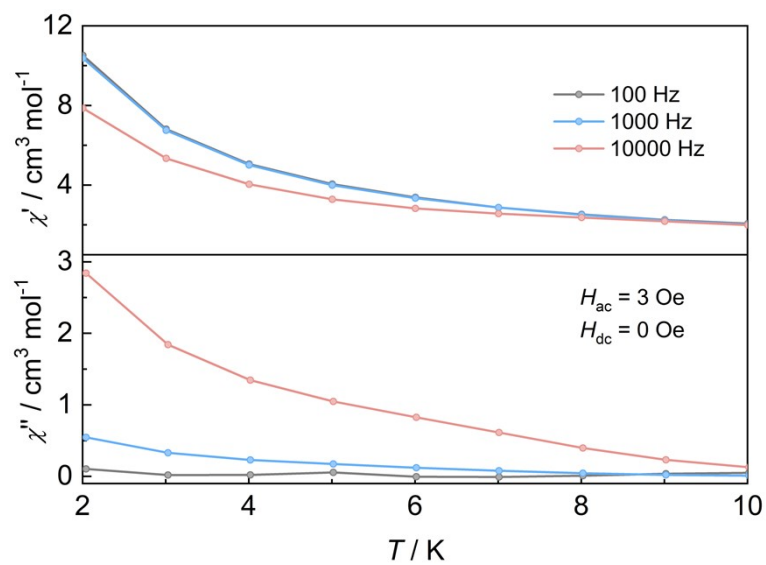

**Fig. S10** Temperature dependences of ac magnetic susceptibilities for **1** under zero dc field.



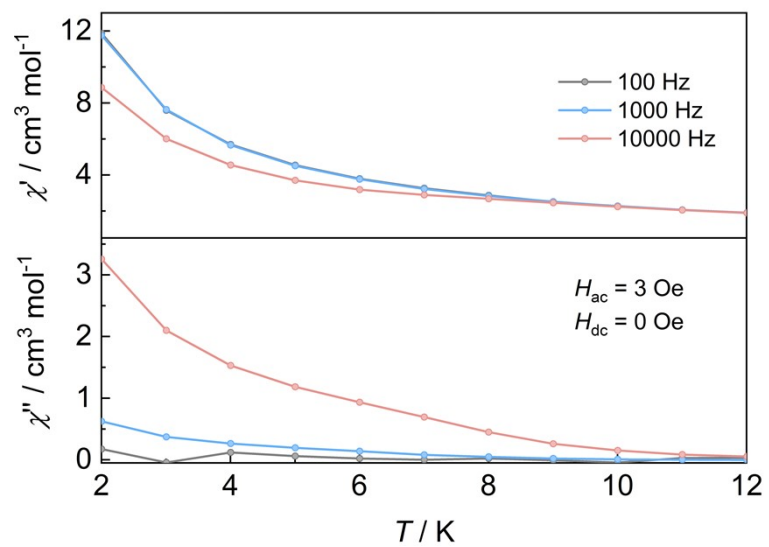

**Fig. S11** Temperature dependences of ac magnetic susceptibilities for **2** under zero dc field.

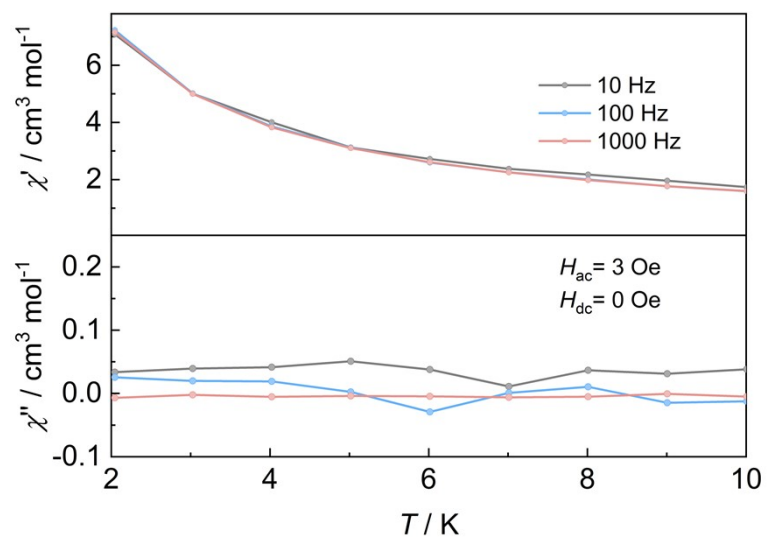

**Fig. S12** Temperature dependences of ac magnetic susceptibilities for **3** under zero dc field.

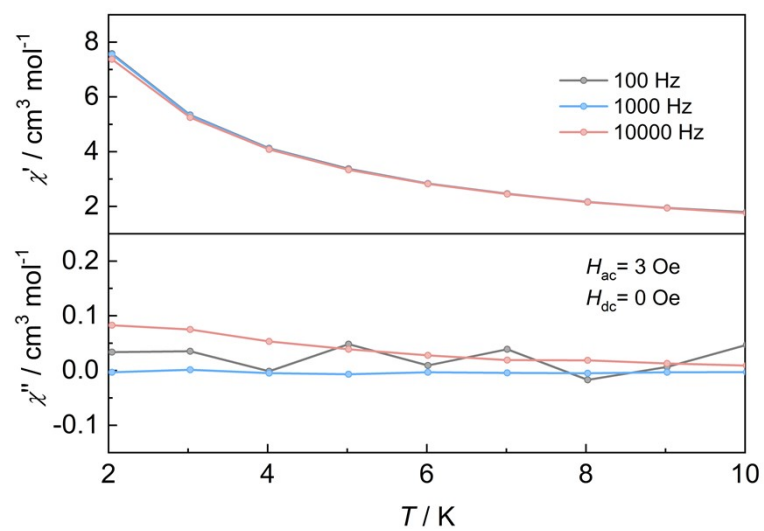

**Fig. S13** Temperature dependences of ac magnetic susceptibilities for **4** under zero dc field.

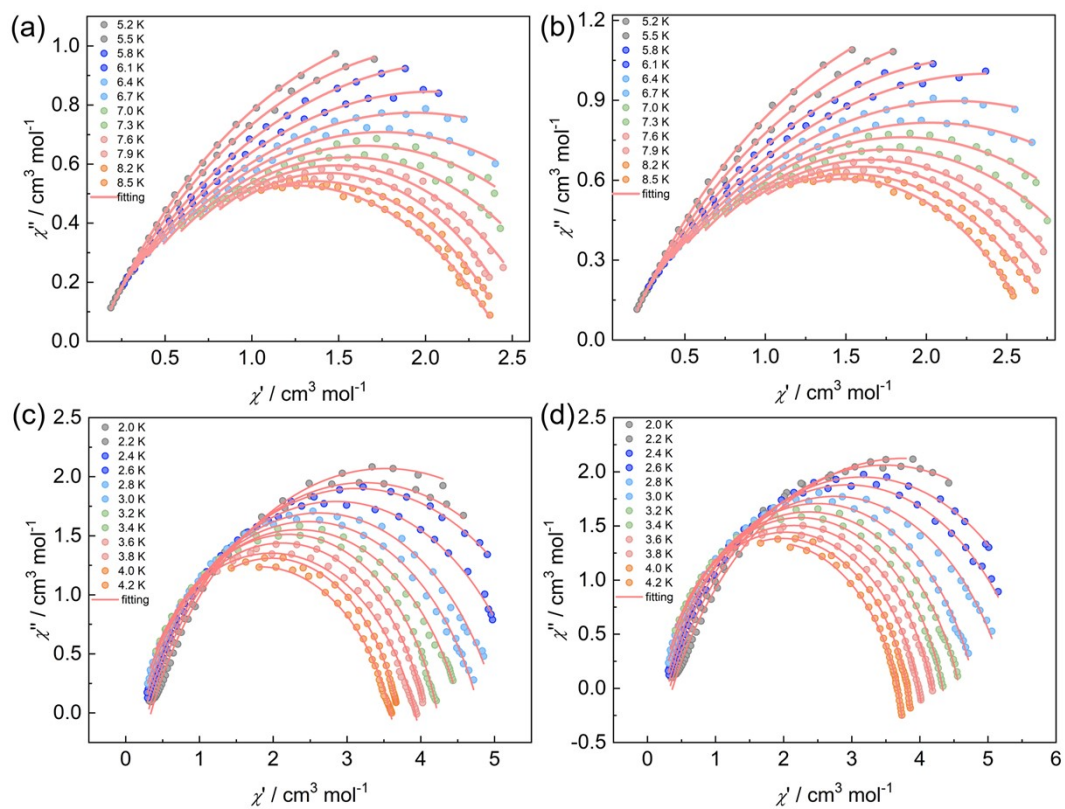

**Fig. S14** Argand plots for **1** (a), **2** (b), **3** (c), and **4** (d). The solid lines indicate the fits to the Debye functions.

---

### Computational details

Complexes **1** and **2** have one type of magnetic center Dy<sup>III</sup> ion, but their structures are not central symmetric. Complete-active-space self-consistent field (CASSCF) calculations on individual Dy<sup>III</sup> fragments for complexes **1–2** (see Fig. S15 for the calculated structures of **1–4**) on the basis of single-crystal X-ray determined geometry have been carried out with the OpenMolcas<sup>S1</sup> program package. Each individual Dy<sup>III</sup> fragment in **1–2** was calculated keeping the experimentally determined structure of the corresponding compound while replacing the neighboring Dy<sup>III</sup> ion by diamagnetic Lu<sup>III</sup>.

The basis sets for all atoms are atomic natural orbitals from the OpenMolcas ANO-RCC library: ANO-RCC-VTZP for Dy<sup>III</sup>; VTZ for close O and N; VDZ for distant atoms. The calculations employed the second order Douglas-Kroll-Hess Hamiltonian, where scalar relativistic contractions were taken into account in the basis set and the spin-orbit couplings were handled separately in the restricted active space state interaction (RASSI-SO) procedure.<sup>S2-S3</sup> Active electrons in 7 active orbitals include all *f* electrons (CAS (9 in 7) in the CASSCF calculation. To exclude all the doubts, we calculated all the roots in the active space. We have mixed the maximum number of spin-free state which was possible with our hardware (all from 21 sextets, 128 from 224 quadruplets, 130 from 490 doublets for Dy<sup>III</sup>). The SINGLE\_ANISO<sup>S4-S6</sup> program was used to obtain the energy levels, *g* tensors, magnetic axes, *et al.* based on the above CASSCF/RASSI-SO calculations.

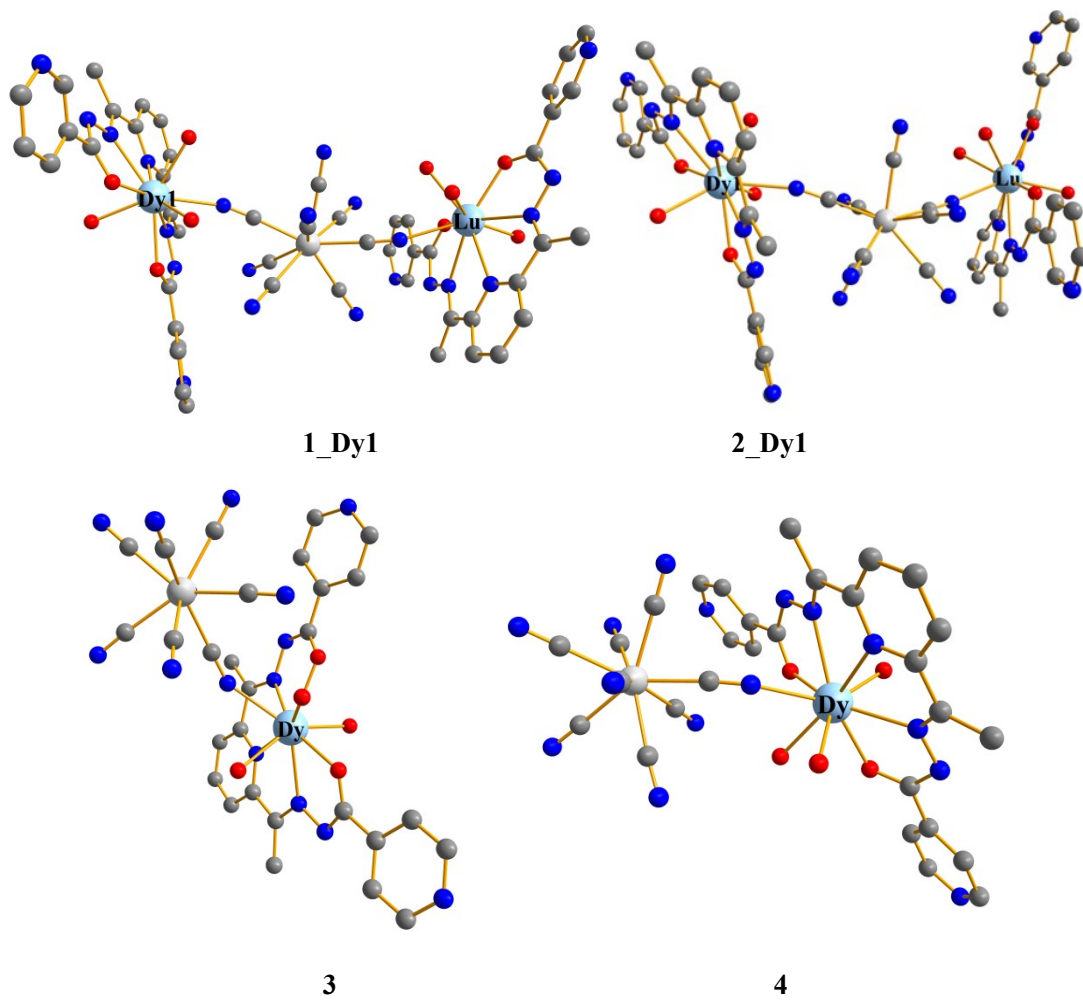

**Fig. S15** Calculated structures of complexes 1\_Dy1, 2\_Dy1, 3, and 4. H atoms are omitted for clarity.

**Table S8.** Calculated energy levels ( $\text{cm}^{-1}$ ),  $\mathbf{g}$  ( $g_x, g_y, g_z$ ) tensors, and predominant  $m_J$  values of the lowest eight Kramers doublets (KDs) of individual  $\text{Dy}^{\text{III}}$  fragments of complexes **1–4** using CASSCF/RASSI-SO with OpenMolcas.

| KDs | <b>1_Dy1</b> |                          |            | <b>2_Dy1</b> |                          |            |
|-----|--------------|--------------------------|------------|--------------|--------------------------|------------|
|     | $E$          | $\mathbf{g}$             | $m_J$      | $E$          | $\mathbf{g}$             | $m_J$      |
| 1   | 0.0          | 0.010<br>0.018<br>19.618 | $\pm 15/2$ | 0.0          | 0.005<br>0.011<br>19.682 | $\pm 15/2$ |
| 2   | 153.9        | 0.289<br>0.617<br>16.726 | $\pm 13/2$ | 167.3        | 0.290<br>0.577<br>16.390 | $\pm 13/2$ |
| 3   | 226.6        | 1.965<br>2.555<br>14.496 | $\pm 9/2$  | 241.7        | 0.883<br>1.126<br>13.548 | $\pm 11/2$ |
| 4   | 265.6        | 1.185<br>3.133<br>11.337 | $\pm 11/2$ | 303.1        | 0.363<br>2.381<br>11.406 | $\pm 9/2$  |
| 5   | 333.6        | 9.287<br>6.147<br>1.567  | $\pm 9/2$  | 375.7        | 1.105<br>4.702<br>8.952  | $\pm 7/2$  |
| 6   | 386.7        | 2.724<br>4.742<br>11.275 | $\pm 7/2$  | 434.7        | 3.138<br>5.107<br>9.488  | $\pm 1/2$  |
| 7   | 427.8        | 1.313<br>2.412<br>17.286 | $\pm 1/2$  | 474.6        | 1.414<br>3.040<br>16.255 | $\pm 3/2$  |
| 8   | 594.8        | 0.016<br>0.029<br>19.576 | $\pm 1/2$  | 662.0        | 0.012<br>0.019<br>19.570 | $\pm 1/2$  |
| KDs | <b>3</b>     |                          |            | <b>4</b>     |                          |            |
|     | $E$          | $\mathbf{g}$             | $m_J$      | $E$          | $\mathbf{g}$             | $m_J$      |
| 1   | 0.0          | 0.002<br>0.030<br>19.554 | $\pm 15/2$ | 0.0          | 0.007<br>0.027<br>19.552 | $\pm 15/2$ |
| 2   | 118.4        | 1.111<br>2.506<br>15.401 | $\pm 13/2$ | 124.6        | 1.174<br>2.941<br>15.067 | $\pm 13/2$ |
| 3   | 159.5        | 1.350<br>3.349<br>12.445 | $\pm 9/2$  | 163.3        | 1.753<br>3.670<br>12.072 | $\pm 9/2$  |

---

|   |       |                          |            |       |                          |           |
|---|-------|--------------------------|------------|-------|--------------------------|-----------|
| 4 | 201.4 | 8.976<br>5.293<br>1.017  | $\pm 11/2$ | 202.5 | 2.585<br>4.771<br>8.838  | $\pm 9/2$ |
| 5 | 270.2 | 0.636<br>4.418<br>9.191  | $\pm 5/2$  | 269.8 | 1.678<br>5.101<br>10.090 | $\pm 7/2$ |
| 6 | 319.1 | 9.380<br>6.505<br>3.192  | $\pm 1/2$  | 322.6 | 9.038<br>5.056<br>0.480  | $\pm 1/2$ |
| 7 | 359.7 | 1.209<br>2.147<br>17.815 | $\pm 5/2$  | 349.7 | 2.009<br>5.466<br>14.308 | $\pm 3/2$ |
| 8 | 484.7 | 0.033<br>0.049<br>19.295 | $\pm 1/2$  | 515.2 | 0.015<br>0.023<br>19.457 | $\pm 1/2$ |



**Table S9.** Wave functions with definite projection of the total moment  $|m_J\rangle$  for the lowest eight KDs of individual Dy<sup>III</sup> fragments for complexes **1–4** using CASSCF/RASSI-SO with OpenMolcas.

|              | $E/\text{cm}^{-1}$ | wave functions                                                                                                                                       |
|--------------|--------------------|------------------------------------------------------------------------------------------------------------------------------------------------------|
| <b>1_Dy1</b> | 0.0                | 96.6% $ \pm 15/2\rangle$                                                                                                                             |
|              | 153.9              | 69.1% $ \pm 13/2\rangle$ +15.1% $ \pm 11/2\rangle$ +8% $ \pm 7/2\rangle$                                                                             |
|              | 226.6              | 27.2% $ \pm 9/2\rangle$ +25.4% $ \pm 11/2\rangle$ +14.8% $ \pm 7/2\rangle$ +13% $ \pm 5/2\rangle$ +9.5% $ \pm 13/2\rangle$ +7.7% $ \pm 3/2\rangle$   |
|              | 265.6              | 28.8% $ \pm 11/2\rangle$ +19.1% $ \pm 9/2\rangle$ +18.7% $ \pm 13/2\rangle$ +13.6% $ \pm 5/2\rangle$ +11.6% $ \pm 7/2\rangle$                        |
|              | 333.6              | 28.5% $ \pm 9/2\rangle$ +22.9% $ \pm 11/2\rangle$ +19.5% $ \pm 3/2\rangle$ +19.3% $ \pm 7/2\rangle$                                                  |
|              | 386.7              | 25.5% $ \pm 7/2\rangle$ +23.3% $ \pm 5/2\rangle$ +22.8% $ \pm 1/2\rangle$ +12.7% $ \pm 9/2\rangle$ +9.6% $ \pm 3/2\rangle$                           |
|              | 427.8              | 34.8% $ \pm 1/2\rangle$ +29.9% $ \pm 3/2\rangle$ +21.5% $ \pm 5/2\rangle$ +9.2% $ \pm 7/2\rangle$                                                    |
|              | 594.8              | 30.4% $ \pm 1/2\rangle$ +29.7% $ \pm 3/2\rangle$ +21.6% $ \pm 5/2\rangle$ +11.4% $ \pm 7/2\rangle$                                                   |
| <b>2_Dy1</b> | 0.0                | 97.6% $ \pm 15/2\rangle$                                                                                                                             |
|              | 167.3              | 79.5% $ \pm 13/2\rangle$ +10.8% $ \pm 11/2\rangle$ +6.1% $ \pm 7/2\rangle$                                                                           |
|              | 241.7              | 47.1% $ \pm 11/2\rangle$ +25.6% $ \pm 9/2\rangle$ +8.6% $ \pm 7/2\rangle$ +7.6% $ \pm 13/2\rangle$ +7.1% $ \pm 5/2\rangle$                           |
|              | 303.1              | 31.1% $ \pm 9/2\rangle$ +20.7% $ \pm 11/2\rangle$ +16.9% $ \pm 7/2\rangle$ +14.7% $ \pm 5/2\rangle$ +9.6% $ \pm 13/2\rangle$                         |
|              | 375.7              | 28.4% $ \pm 7/2\rangle$ +22.3% $ \pm 3/2\rangle$ +22.1% $ \pm 9/2\rangle$ +13.6% $ \pm 11/2\rangle$ +8.2% $ \pm 5/2\rangle$                          |
|              | 434.7              | 31.2% $ \pm 1/2\rangle$ +27.6% $ \pm 5/2\rangle$ +18.7% $ \pm 7/2\rangle$ +10.2% $ \pm 9/2\rangle$ +6% $ \pm 3/2\rangle$                             |
|              | 474.6              | 35.6% $ \pm 3/2\rangle$ +27.6% $ \pm 1/2\rangle$ +20.4% $ \pm 5/2\rangle$ +10.5% $ \pm 7/2\rangle$                                                   |
|              | 662.0              | 33.8% $ \pm 1/2\rangle$ +29.4% $ \pm 3/2\rangle$ +19.9% $ \pm 5/2\rangle$ +10.4% $ \pm 7/2\rangle$                                                   |
| <b>3</b>     | 0.0                | 96% $ \pm 15/2\rangle$                                                                                                                               |
|              | 118.4              | 66.2% $ \pm 13/2\rangle$ +17.8% $ \pm 11/2\rangle$ +6.6% $ \pm 5/2\rangle$                                                                           |
|              | 159.5              | 32.2% $ \pm 9/2\rangle$ +25.8% $ \pm 11/2\rangle$ +12.5% $ \pm 13/2\rangle$ +10.6% $ \pm 13/2\rangle$ +9.3% $ \pm 3/2\rangle$                        |
|              | 201.4              | 22.9% $ \pm 11/2\rangle$ +22.6% $ \pm 9/2\rangle$ +22.1% $ \pm 7/2\rangle$ +9.7% $ \pm 5/2\rangle$ +9.5% $ \pm 13/2\rangle$ +8.9% $ \pm 1/2\rangle$  |
|              | 270.2              | 24.9% $ \pm 5/2\rangle$ +19.5% $ \pm 7/2\rangle$ +14.8% $ \pm 3/2\rangle$ +13.4% $ \pm 9/2\rangle$ +11.1% $ \pm 11/2\rangle$ +9.4% $ \pm 1/2\rangle$ |
|              | 319.1              | 30.8% $ \pm 1/2\rangle$ +25.2% $ \pm 3/2\rangle$ +11.5% $ \pm 7/2\rangle$ +11.2% $ \pm 11/2\rangle$ +10.6% $ \pm 9/2\rangle$ +8% $ \pm 5/2\rangle$   |
|              | 359.7              | 23.2% $ \pm 5/2\rangle$ +19.2% $ \pm 1/2\rangle$ +18.5% $ \pm 3/2\rangle$ +17.2% $ \pm 7/2\rangle$ +11.7% $ \pm 9/2\rangle$ +6.1% $ \pm 11/2\rangle$ |
|              | 484.7              | 29.6% $ \pm 1/2\rangle$ +26.7% $ \pm 3/2\rangle$ +19.8% $ \pm 5/2\rangle$ +11.9% $ \pm 7/2\rangle$ +7.2% $ \pm 9/2\rangle$                           |
| <b>4</b>     | 0.0                | 95.7% $ \pm 15/2\rangle$                                                                                                                             |
|              | 124.6              | 61.6% $ \pm 13/2\rangle$ +16.6% $ \pm 11/2\rangle$ +8.3% $ \pm 7/2\rangle$ +7.7% $ \pm 5/2\rangle$                                                   |
|              | 163.3              | 28% $ \pm 9/2\rangle$ +26.4% $ \pm 11/2\rangle$ +15.2% $ \pm 13/2\rangle$ +12.8% $ \pm 7/2\rangle$ +8.9% $ \pm 3/2\rangle$                           |

|       |                                                                         |
|-------|-------------------------------------------------------------------------|
| 202.5 | 29.5% ±9/2>+20.6% ±11/2>+15% ±7/2>+12.5% ±13/2>+11.9% ±5/2>+7.4% ±1/2>  |
| 269.8 | 24.9% ±7/2>+18.8% ±5/2>+18.3% ±3/2>+12.1% ±11/2>+10.3% ±9/2>+9.1% ±1/2> |
| 322.6 | 36% ±1/2>+15.5% ±3/2>+15.5% ±11/2>+11.9% ±5/2>+10.5% ±7/2>+8% ±9/2>     |
| 349.7 | 25.5% ±3/2>+23.9% ±5/2>+15.6% ±7/2>+14.4% ±9/2>+13.3% ±1/2>             |
| 515.2 | 30.8% ±1/2>+26.5% ±3/2>+19.5% ±5/2>+12.2% ±7/2>+6.9% ±9/2>              |

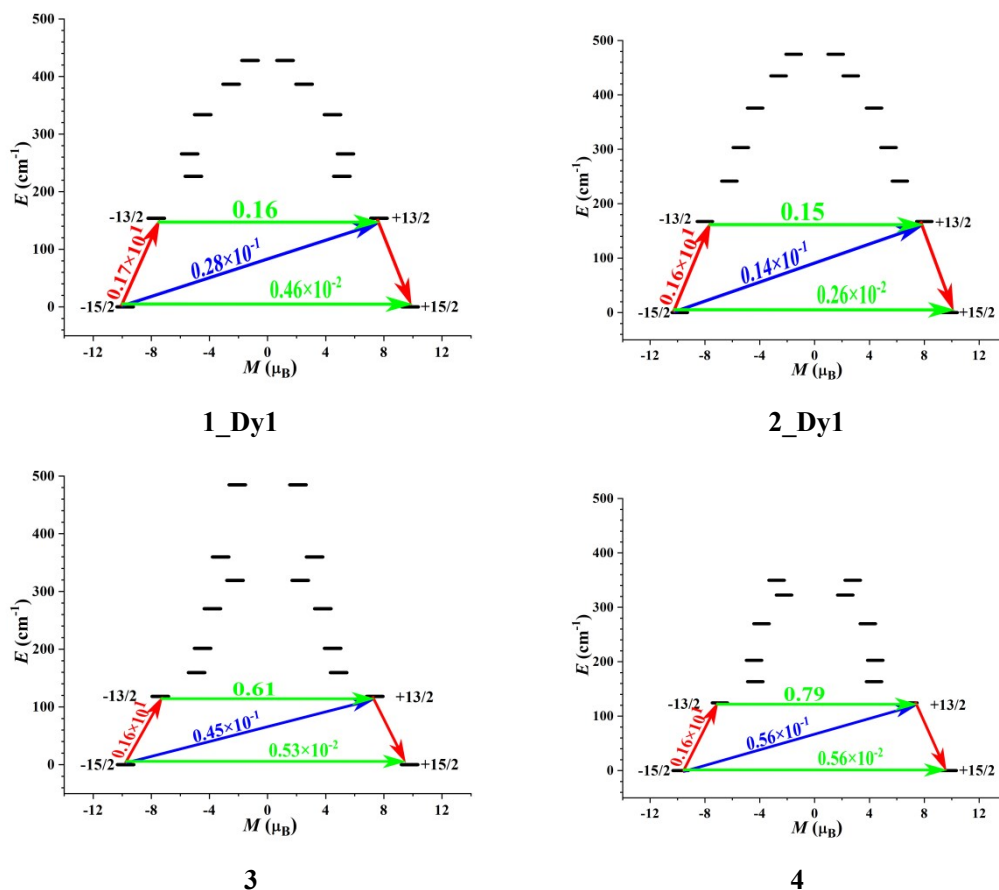

**Fig. S16** Magnetization blocking barriers of individual Dy<sup>III</sup> fragments for 1–4. The thick black lines represent the KDs as a function of their magnetic moment along the magnetic axis. The green lines correspond to diagonal quantum tunneling of magnetization (QTM); the blue line represent off-diagonal relaxation process. The numbers at each arrow stand for the mean absolute value of the corresponding matrix element of transition magnetic moment.

---

## References:

- S1 I. F. Galván, M. Vacher, A. Alavi, C. Angeli, F. Aquilante, J. Autschbach, J. J. Bao, S. I. Bokarev, N. A. Bogdanov, R. K. Carlson, L. F. Chibotaru, J. Creutzberg, N. Dattani, M. G. Delcey, S. S. Dong, A. Dreuw, L. Freitag, L. M. Frutos, L. Gagliardi, F. Gendron, A. Giussani, L. González, G. Grell, M. Guo, C. E. Hoyer, M. Johansson, S. Keller, S. Knecht, G. Kovačević, E. Källman, G. L. Manni, M. Lundberg, Y. J. Ma, S. Mai, J. P. Malhado, P. Å. Malmqvist, P. Marquetand, S. A. Mewes, J. Norell, M. Olivucci, M. Oppel, Q. M. Phung, K. Pierloot, F. Plasser, M. Reiher, A. M. Sand, I. Schapiro, P. Sharma, C. J. Stein, L. K. Sørensen, D. G. Truhlar, M. Ugandi, L. Ungur, A. Valentini, S. Vancoillie, V. Veryazov, O. Weser, T. A. Wesolowski, P. O. Widmark, S. Wouters, A. Zech, J. P. Zobel and R. Lindh, *J. Chem. Theory Comput.*, 2019, **15**, 5925–5964.
- S2 P. Å. Malmqvist, B. O. Roos and B. Schimmelpfennig, *Chem. Phys. Lett.*, 2002, **357**, 230–240.
- S3 B. A. Heß, C. M. Marian, U. Wahlgren and O. Gropen, *Chem. Phys. Lett.*, 1996, **251**, 365–371.
- S4 L. F. Chibotaru, L. Ungur and A. Soncini, *Angew. Chem., Int. Ed.*, 2008, **47**, 4126–4129.
- S5 L. Ungur, W. Van den Heuvel and L. F. Chibotaru, *New J. Chem.*, 2009, **33**, 1224–1230.
- S6 L. F. Chibotaru, L. Ungur, C. Aronica, H. Elmoll, G. Pilet and D. Luneau, *J. Am. Chem. Soc.*, 2008, **130**, 12445–12455.
- S7 M. E. Lines, *J. Chem. Phys.*, 1971, **55**, 2977–2984.
- S8 K. C. Mondal, A. Sundt, Y. Lan, G. E. Kostakis, O. Waldmann, L. Ungur, L. F. Chibotaru, C. E. Anson and A. K. Powell, *Angew. Chem., Int. Ed.*, 2012, **51**, 7550–7554.
- S9 S. K. Langley, D. P. Wielechowski, V. Vieru, N. F. Chilton, B. Moubaraki, B. F. Abrahams, L. F. Chibotaru and K. S. Murray, *Angew. Chem., Int. Ed.*, 2013, **52**, 12014–12019.
